# Supplementary material for: The mTORC1 complex in pre-osteoblasts regulates whole-body energy metabolism independently of osteocalcin
Source: PubMed Central journal article supplement (PMC7868369; doi:10.1038/s41413-020-00123-z), 2021-02-08

Fig. 3f : Adiponec n (HMW/LMW)

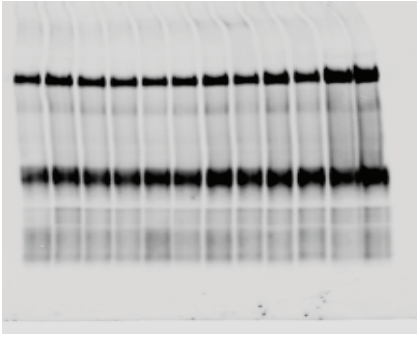

Fig. 3ef:Adiponec n (total)

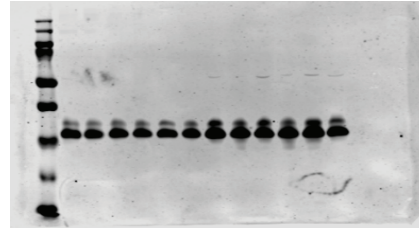

Fig. 3i : Adipoq/ac n (gWAT)

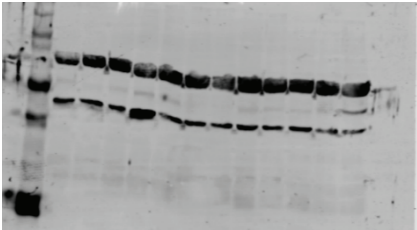

ACTIN  
ADIPOQ

Fig. 3i : Adipoq/ac n (iWAT)

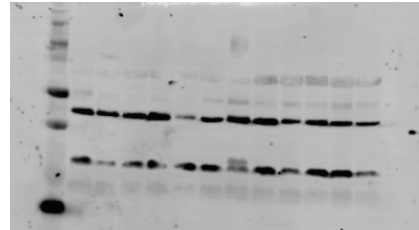

ACTIN  
ADIPOQ

Fig. 3i : actin (Tib/fem)

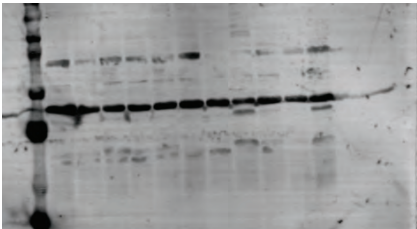

ACTIN

Fig. 3i : Adipoq (Tib/fem)\_ADIPOQ

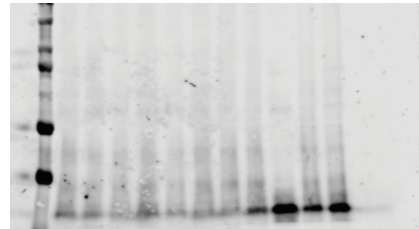

Fig. 5a:muscle

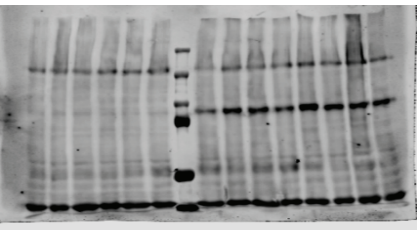

IRS1  
P-INSR  
ACTIN

Fig. 5a:muscle\_INSR

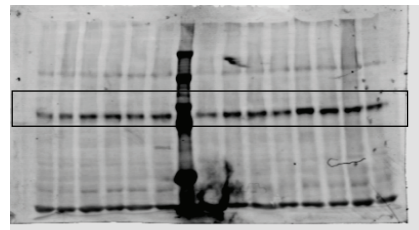

Fig. 5a:muscle\_p-AKT

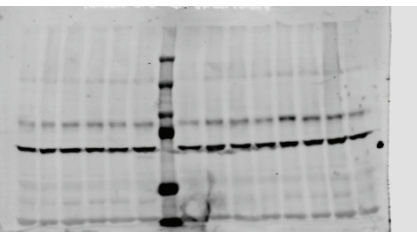

Fig. 5a:muscle\_AKT

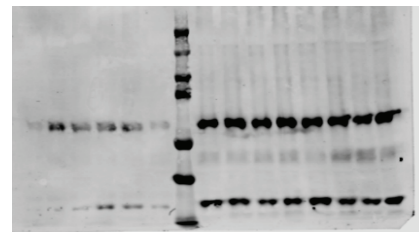

Fig. 5a:muscle\_p-rpS6

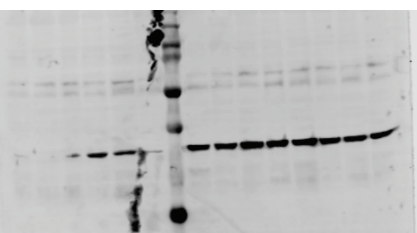

Fig. 5a:muscle\_rpS6

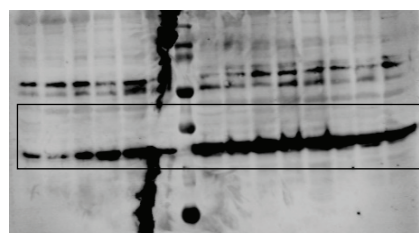

Fig. 5b:liver\_IRS1

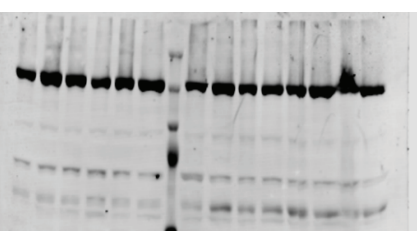

Fig. 5b:liver\_ACTIN

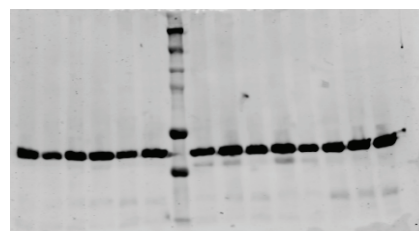

Fig. 5b:liver\_p-INSR

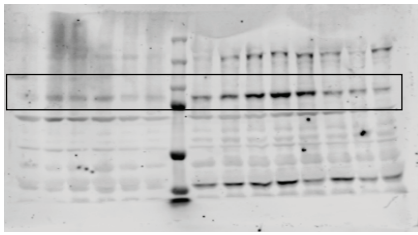

Fig. 5b:liver\_INSR

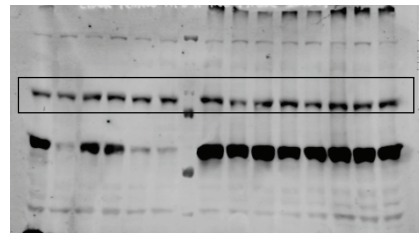

Fig. 5b:liver\_p-AKT

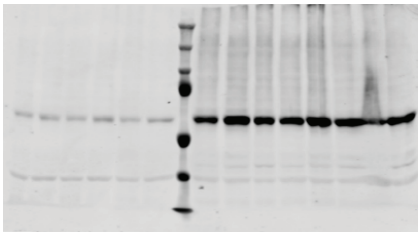

Fig. 5b:liver\_AKT

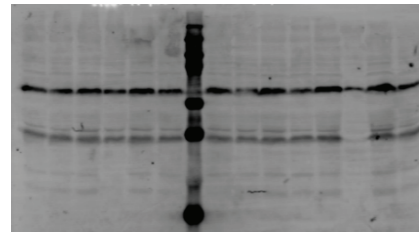

Fig. 5b:liver\_p-rpS6

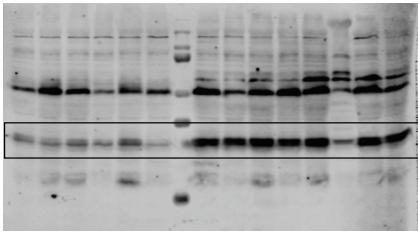

Fig. 5b:liver\_S6

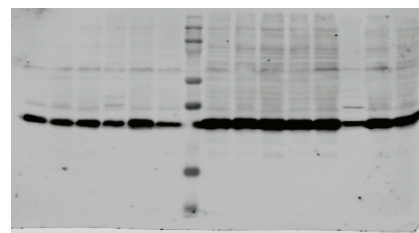

Fig. 5c:iWAT\_IRS1

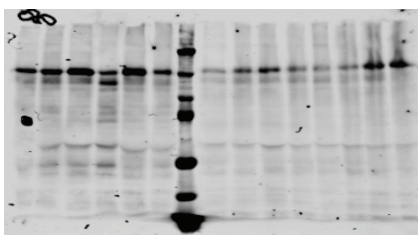

Fig. 5c:iWAT\_ACTIN

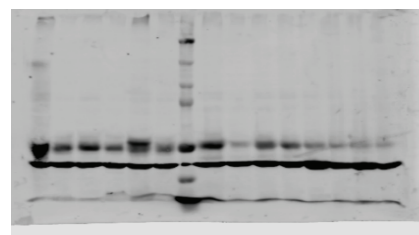

Fig. 5c:iWAT

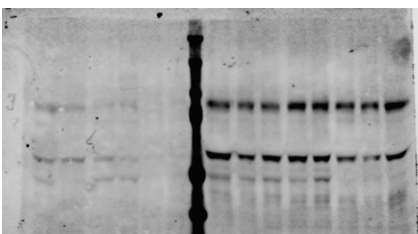

Fig. 5c:iWAT

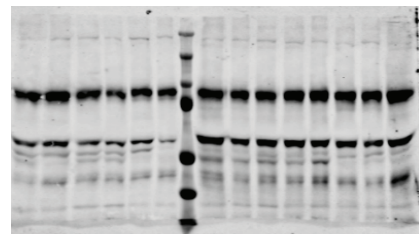

P-INSR

P-AKT

INSR

AKT

Fig. 5c:iWAT\_p-rpS6

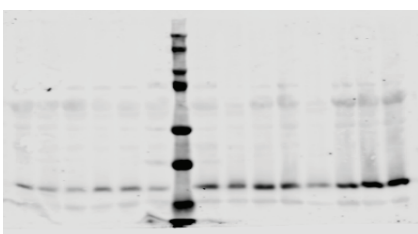

Fig. 5c:iWAT\_rpS6

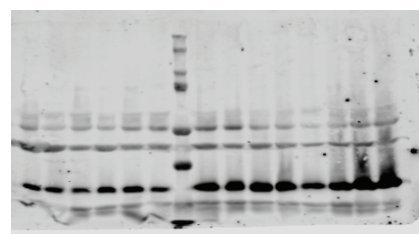

Fig. 5d:gWAT\_IRS1

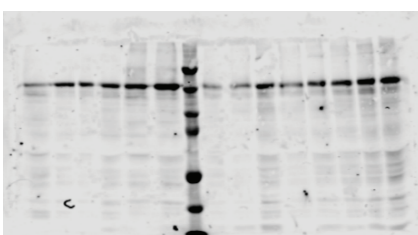

Fig. 5d:gWAT\_ACTIN

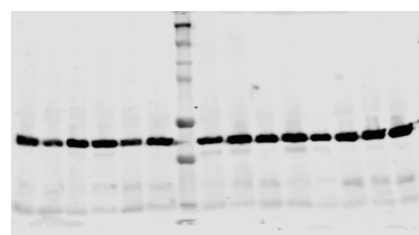

Fig. 5d:gWAT\_p-INSR

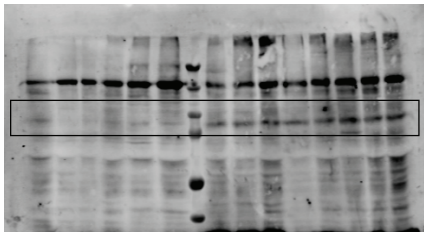

Fig. 5d:gWAT\_INSR

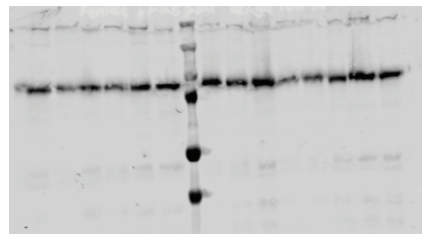

Fig. 5d:gWAT\_p-AKT

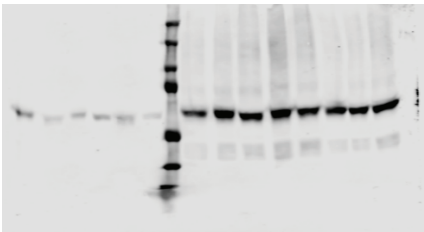

Fig. 5d:gWAT\_AKT

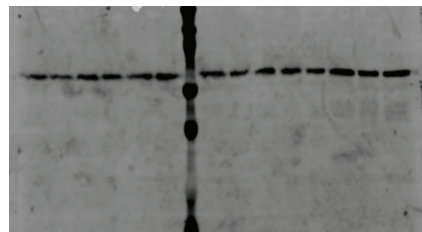

Fig. 5d:gWAT\_p-rpS6

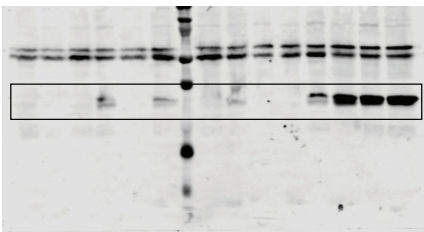

Fig. 5d:gWAT\_rpS6

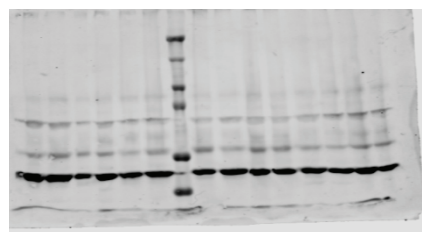

Fig. 5j: Adiponectin (HMW/LMW)

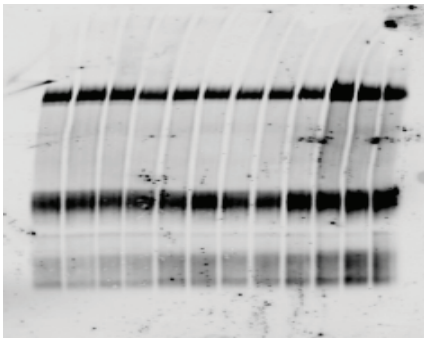

Fig. 5j: Adiponectin (total)

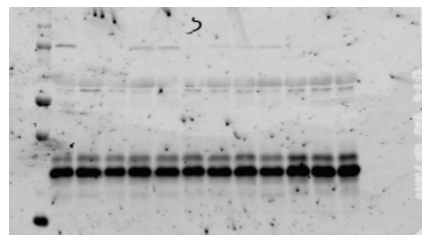

Fig. 6o: ACTIN/UCP1 (iWAT)

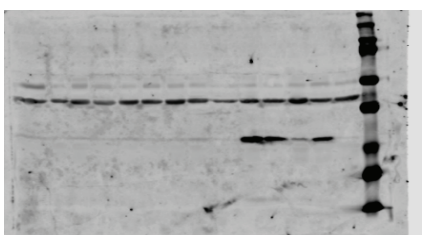

ACTIN  
UCP1

Fig. 8b: calvaria +/- insulin

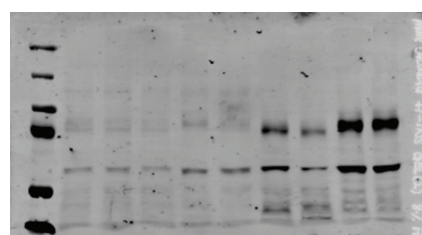

p-INSR  
p-AKT T308

Fig. 8b: calvaria +/- insulin

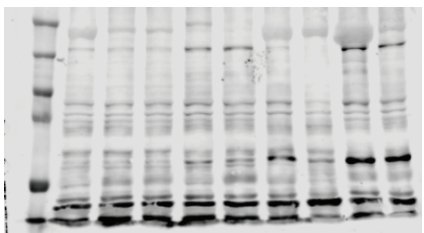

p-AS160  
p-AKT S473

Fig. 8b: calvaria +/- insulin

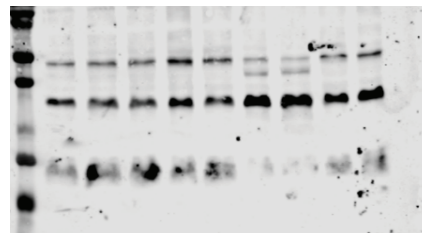

p-GSK  
p-rpS6

Fig. 8b: calvaria +/- insulin

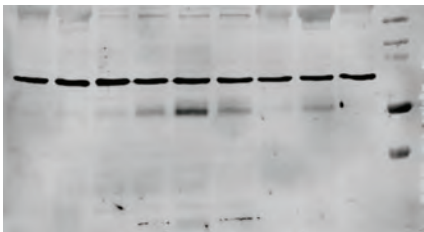

AKT

Fig. 8b: calvaria +/- insulin

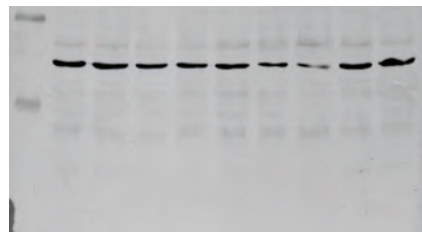

GSK



Fig. 8b: calvaria +/- insulin

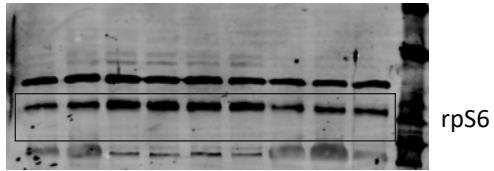

Fig. 8b: calvaria +/- insulin

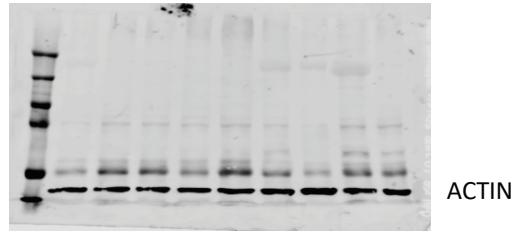

Fig. 8c: RAPTOR

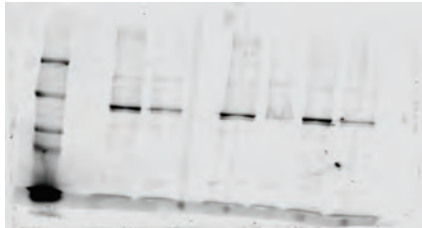

Fig. 8c: p-rpS6

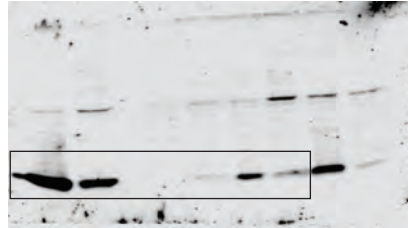

Fig. 8c: rpS6

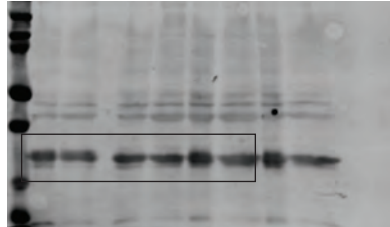

Fig. 8c: 4E-BP1

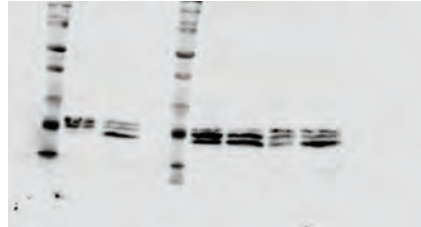

Fig. 8c: p-INSR

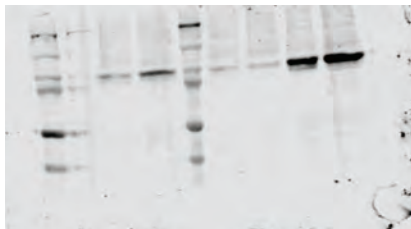

Fig. 8c: INSR

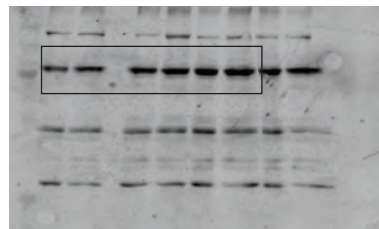

Fig. 8c: p-AKT S473

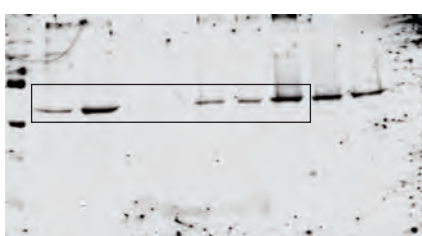

Fig. 8c: p-AKT T308

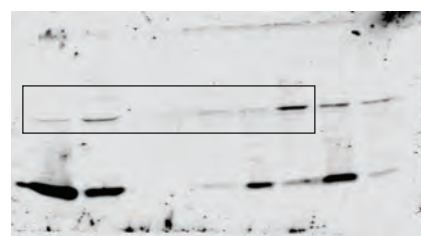

Fig. 8c: AKT

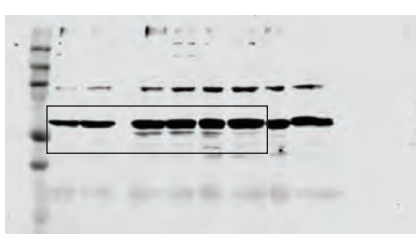

Fig. 8c: p-GSK

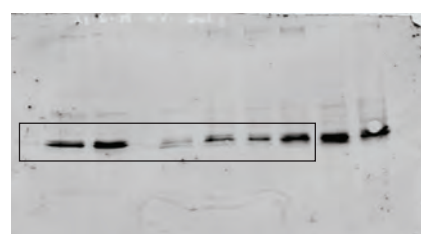



Fig. 8c: GSK

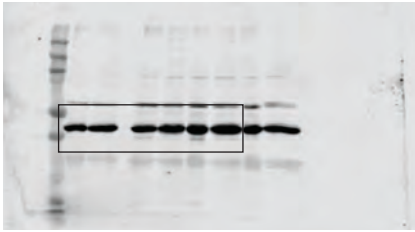

Fig. 8c: a-TUBULIN

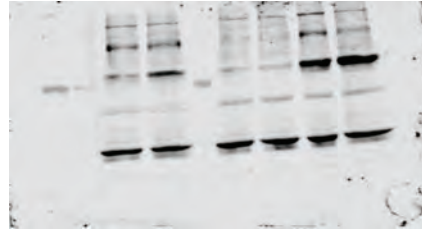

Supp Fig. 2b: iWAT\_RAPTOR

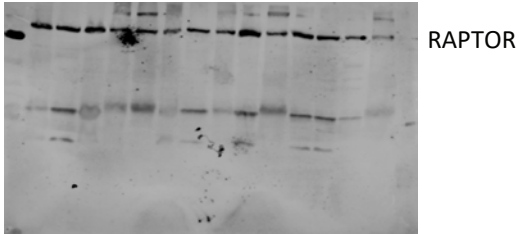

Supp Fig. 2b: iWAT\_actin

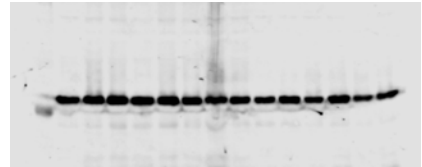

Supp Fig. 2b: liver\_RAPTOR

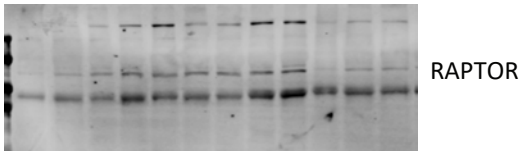

Supp Fig. 2b: liver\_actin

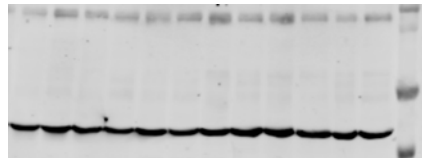

Supp Fig. 2b: muscle\_RAPTOR

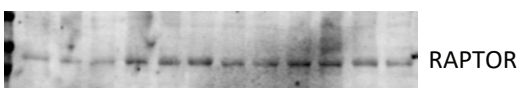

Supp Fig. 2b: muscle\_actin

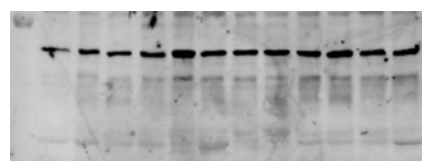

Supp Fig. 3m: iBAT\_UCP1

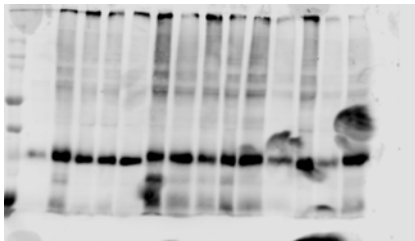

Supp Fig. 3m: iBAT\_HCS70

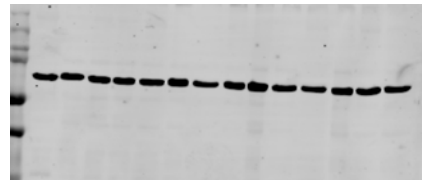

Supp Fig. 4c : liver (+PBS)

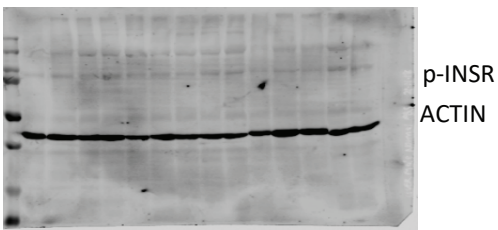

Supp Fig. 4c: liver (+insulin)

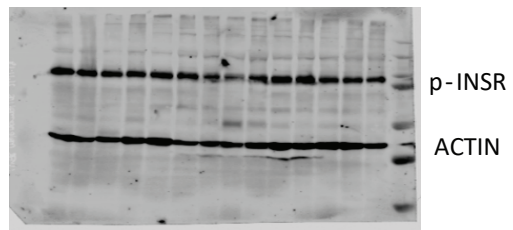

Supp Fig. 4c: liver (+PBS)\_INSR

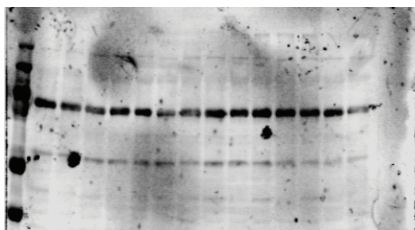

Supp Fig. 2c: liver (+PBS)\_p-AKT

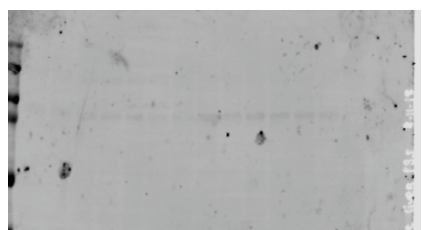

Supp Fig. 4c: liver (+insulin)\_p-AKT

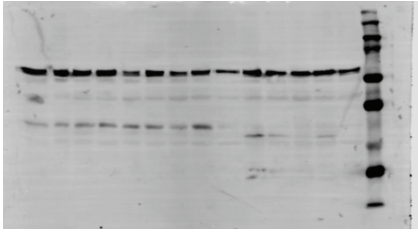

Supp Fig. 4c: liver (+PBS)\_AKT

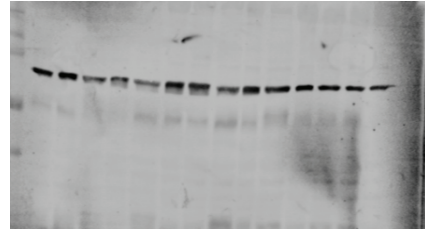

Supp Fig. 4c: liver (+insulin)\_AKT

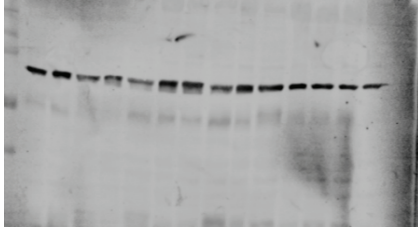

Supp Fig. 4d: muscle(+PBS)\_p-INSR

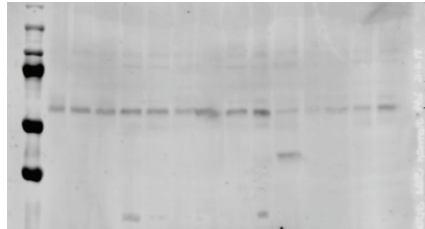

Supp Fig. 4d: muscle(+insulin)\_p-INSR

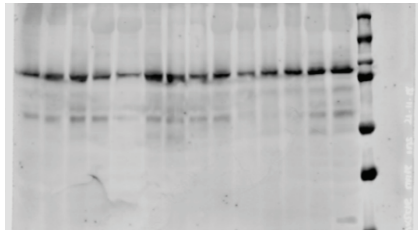

Supp Fig. 4d: muscle(+PBS)\_INSR

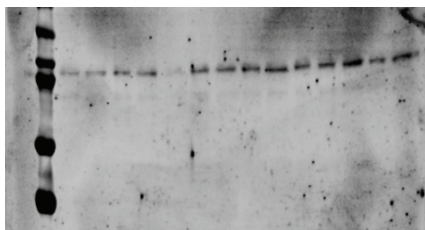

Supp Fig. 4d: muscle(+insulin)\_p-AKT

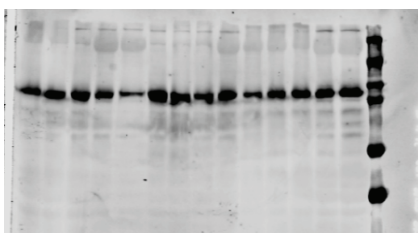

Supp Fig. 4d: muscle(+PBS)\_p-AKT

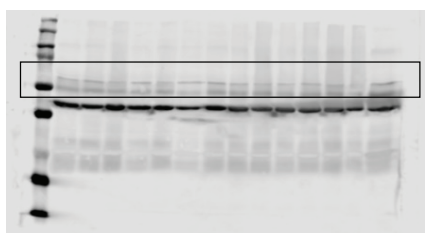

Supp Fig.8b : gWAT UCP1 and ACTIN

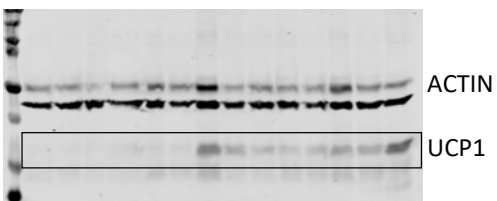

Supp Fig.8b : iBAT UCP1 and ACTIN

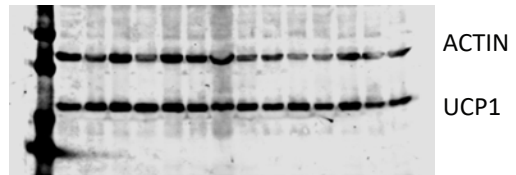

Supplement: 41413_2020_123_MOESM10_ESM.pdf [file 41413_2020_123_MOESM10_ESM.pdf]
