# Supplementary material for: The mTORC1 complex in pre-osteoblasts regulates whole-body energy metabolism independently of osteocalcin
Source: PubMed Central journal article supplement (PMC7868369; doi:10.1038/s41413-020-00123-z), 2021-02-08

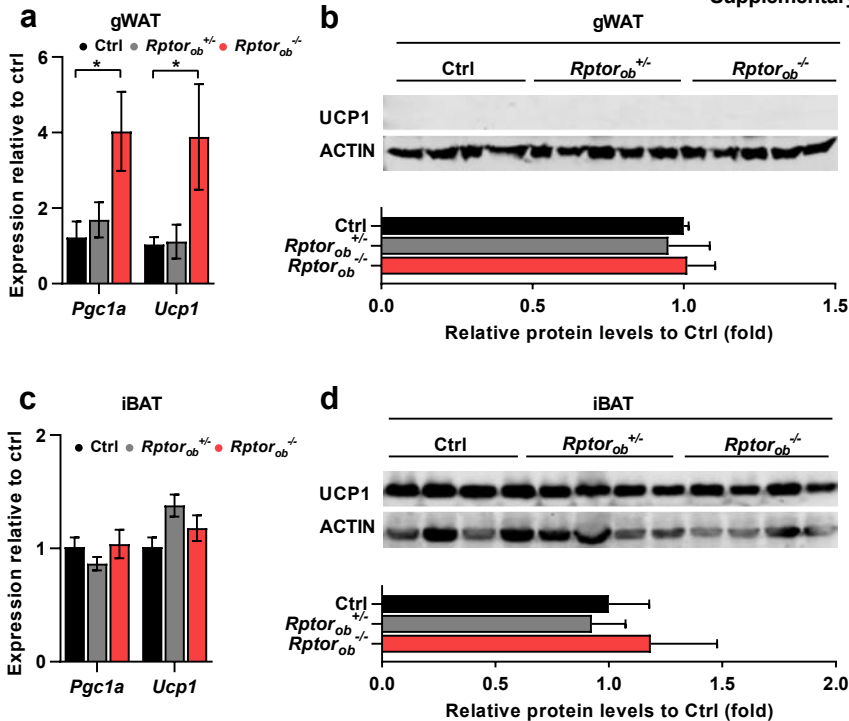

Supplement: 41413_2020_123_MOESM8_ESM.pdf [file 41413_2020_123_MOESM8_ESM.pdf]
